# Supplementary material for: Socioeconomic Determinants, Maternal Health, and Caries in Young Children
Source: PubMed Central journal article supplement — JDR Clin Trans Res. 2018 Jul 13;3(4):395–404. doi: 10.1177/2380084418788066 (PMC6139990; doi:10.1177/2380084418788066), 2018-07-13
Supplement: DS_10.1177_2380084418788066.pdf [file DS_10.1177_2380084418788066.pdf]

## Socioeconomic Determinants, Maternal Health, and Caries in Young Children

A. Julihn, F.C. Soares, A. Hjern, and G. Dahllöf

### Appendix

Appendix Table. Univariate analysis of variables associated with caries experience in 3- and 7-year old children

| Variables                    | Category           | Caries experience (3 years)<br>n = 73,658 |              |                  | Caries experience (7 years)<br>n = 65,259 |              |                  |
|------------------------------|--------------------|-------------------------------------------|--------------|------------------|-------------------------------------------|--------------|------------------|
|                              |                    | No<br>n (%)                               | Yes<br>n (%) | P                | No<br>n (%)                               | Yes<br>n (%) | P                |
| Family income<br>(Quintile)  | 1st (lowest)       | 11126 (89)                                | 1405 (11)    | <b>&lt;0.001</b> | 8461 (59)                                 | 5958 (41)    | <b>&lt;0.001</b> |
|                              | 2nd                | 12171 (94)                                | 767 (6)      |                  | 10614 (72)                                | 4022 (28)    |                  |
|                              | 3rd                | 12457 (96)                                | 578 (4)      |                  | 11318 (77)                                | 3295 (23)    |                  |
|                              | 4th                | 12612 (96)                                | 515 (4)      |                  | 11797 (81)                                | 2815 (19)    |                  |
|                              | 5th (highest)      | 12797 (97)                                | 365 (3)      |                  | 12170 (83)                                | 2437 (17)    |                  |
| Maternal country at<br>birth | Well-developed     | 51369 (97)                                | 1827 (3)     | <b>&lt;0.001</b> | 47968 (80)                                | 11665 (20)   | <b>&lt;0.001</b> |
|                              | Under-developed    | 10234 (94)                                | 1829 (6)     |                  | 7003 (50)                                 | 7022 (50)    |                  |
| Parity                       | 1                  | 29240 (96)                                | 1284 (4)     | <b>&lt;0.001</b> | 27090 (79)                                | 7287 (21)    | <b>&lt;0.001</b> |
|                              | ≥2 children        | 32363 (93)                                | 2372 (7)     |                  | 27881 (71)                                | 11400 (29)   |                  |
| Maternal education<br>level  | ≤9 years           | 4790 (86)                                 | 803 (14)     | <b>&lt;0.001</b> | 3450 (51)                                 | 3297 (49)    | <b>&lt;0.001</b> |
|                              | 10-12 years        | 23966 (47)                                | 1637 (6)     |                  | 20588 (71)                                | 8341 (29)    |                  |
|                              | ≥13 years          | 32520 (96)                                | 1196 (4)     |                  | 30604 (81)                                | 6933 (19)    |                  |
| Marital status               | Cohabiting parents | 50253 (95)                                | 2663 (5)     | <b>&lt;0.001</b> | 45035 (76)                                | 13880 (24)   | <b>&lt;0.001</b> |
|                              | Single             | 11350 (92)                                | 993 (8)      |                  | 9939 (67)                                 | 4807 (33)    |                  |
| Maternal age at<br>delivery  | 25 to 34           | 38908 (95)                                | 1924 (5)     | <b>&lt;0.001</b> | 35390 (77)                                | 10351 (23)   | <b>&lt;0.001</b> |
|                              | <25                | 8047 (91)                                 | 820 (9)      |                  | 6501 (62)                                 | 4050 (38)    |                  |
|                              | >34                | 14648 (94)                                | 912 (6)      |                  | 13080 (75)                                | 4286 (25)    |                  |
| Smoking during<br>pregnancy  | No                 | 51034 (95)                                | 2877 (5)     | <b>&lt;0.001</b> | 45806 (76)                                | 14729 (24)   | <b>&lt;0.001</b> |
|                              | Yes                | 4020 (90)                                 | 440 (10)     |                  | 3239 (61)                                 | 2097 (39)    |                  |
| Obesity                      | No                 | 46331 (95)                                | 2620 (5)     | <b>&lt;0.001</b> | 41439 (75)                                | 13661 (25)   | <b>&lt;0.001</b> |
|                              | Yes                | 3444 (91)                                 | 345 (9)      |                  | 2885 (66)                                 | 1503 (34)    |                  |
| Maternal health<br>condition | Healthy            | 53401 (95)                                | 3113 (5)     | <b>0.008</b>     | 47734 (75)                                | 16075 (25)   | <b>0.005</b>     |
|                              | Not healthy        | 8202 (94)                                 | 543 (6)      |                  | 7237 (73)                                 | 2612 (27)    |                  |

\* Chi-square test
